# Supplementary material
Source: PubMed Central journal article supplement (PMC3141943)
Supplement: 1104505108_pnas.1104505108_SI.pdf [file 1104505108_pnas.1104505108_SI.pdf]

# Supporting Information

Kalli et al. 10.1073/pnas.1104505108

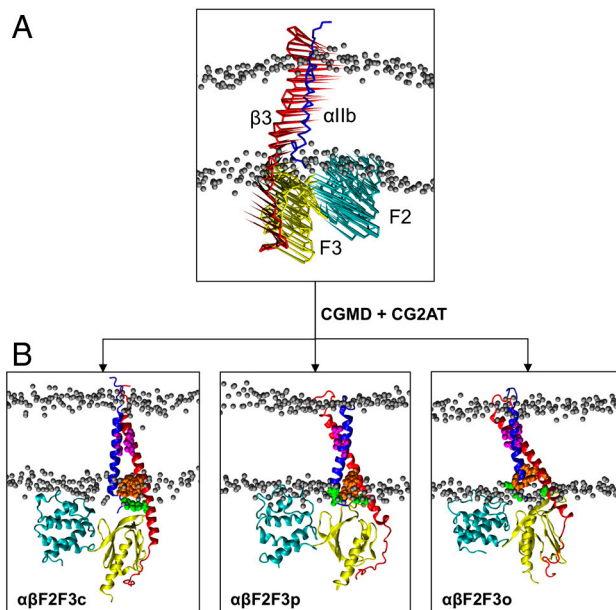

**Fig. S1.** Simulations of the  $\alpha_{11b}\beta_3$  transmembrane (TM) helix dimer in complex with talin F2-F3. (A) Relative movements of the  $\beta$ , F2, and F3 domains in the  $\alpha\beta$ -F2F3-CG simulation. The displacements of F2 (cyan), F3 (yellow), and the  $\beta$  TM helix (red) over the course of the simulation are shown as arrows mapped, the lengths of which represent the displacements. For this calculation, the  $\alpha_{11b}$  TM coordinates were superimposed. (B) Initial configurations of the atomistic simulations of  $\alpha\beta$ -F2F3c-AT ("closed"; see Table 1 for details and nomenclature used for simulations),  $\alpha\beta$ -F2F3p-AT ("partial"), and  $\alpha\beta$ -F2F3o-AT ("open"); these configurations were obtained by clustering the coarse-grained-molecular dynamics simulations and converting them to AT resolution. The color scheme is outer membrane clasp (magenta), inner membrane clasp (orange and green), F2 (cyan), F3 (yellow),  $\beta$  TM (red), and  $\alpha_{11b}$  TM (blue).

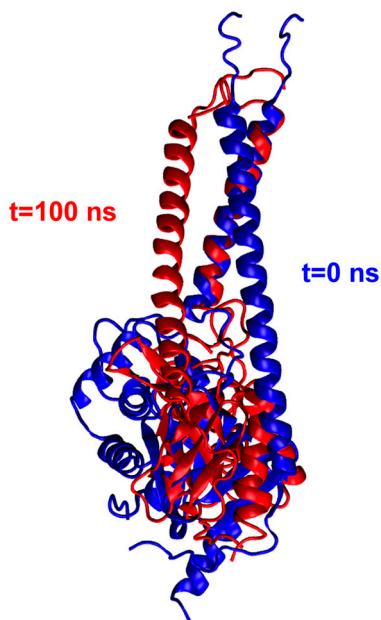

**Fig. S2.** Alignment of the  $\alpha_{11b}$  subunit from the initial F2-F3 +  $\alpha_{11b}\beta_3$  model (blue) and at the end of the  $\alpha\beta$ -F2F3o-AT (red) simulation, demonstrating the rotation of the  $\beta$  subunit perpendicular to the bilayer normal.
